# Supplementary material for: Redox Modulation Protects Islets From Transplant-Related Injury
Source: PubMed Central journal article supplement — Diabetes. 2010 Apr 22;59(7):1731–8. doi: 10.2337/db09-0588 (PMC2889773; doi:10.2337/db09-0588), 2010-04-22

**SUPPLEMENTAL Figure 1.** Treating islets with CA prior to suboptimal syngeneic transplant leads to improved glycemic control. Islets were incubated with CA or remained untreated for 24 hrs then 100 untreated or 100 CA-treated islets were transplanted into diabetic syngeneic recipients. A fasting IPGTT was performed 4 weeks post-transplant. A zero minute reading prior to glucose injection and 30, 60, 90, 120 minute blood glucose readings are graphed. IPGTT data for recipients of untreated islets are denoted with black squares (n=2) and recipients of CA-treated islets with black triangles (n=4).

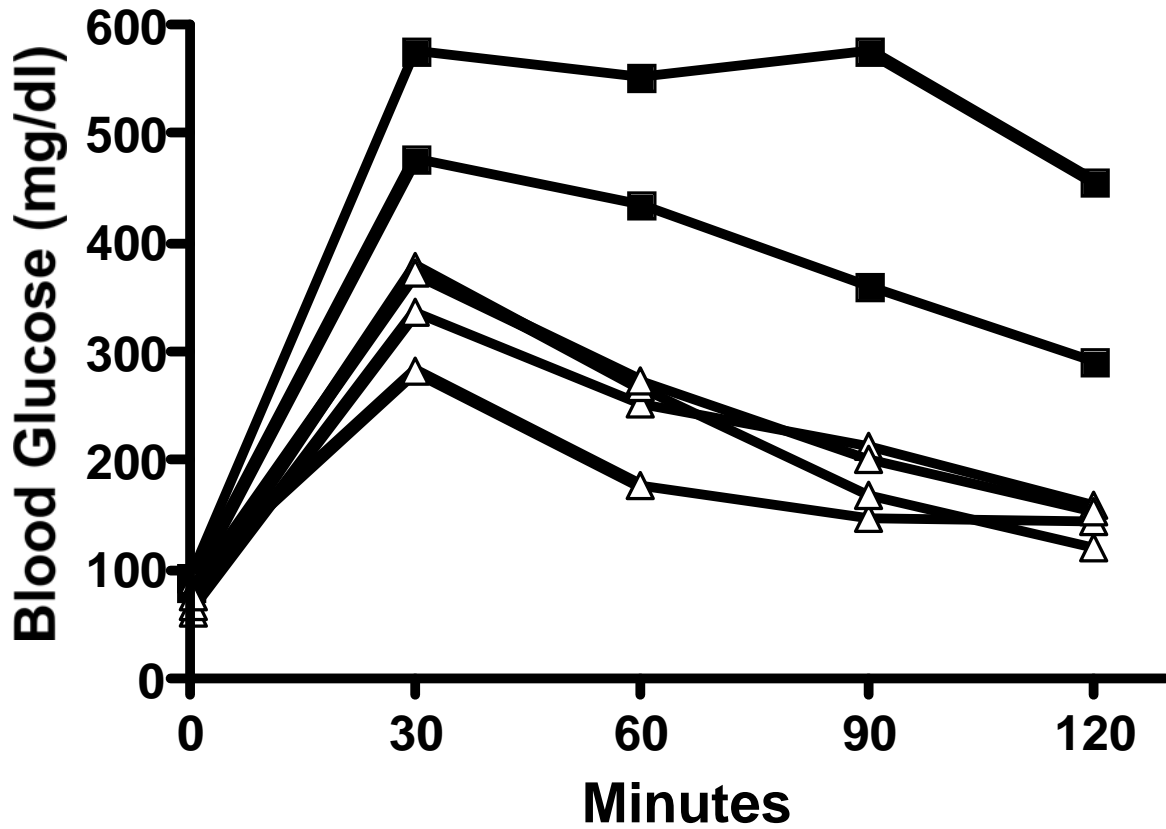

Supplement: supp_db09-0588_onlineappendix.pdf [file supp_db09-0588_onlineappendix.pdf]
